# Supplementary material for: Impact of Combined Baricitinib and FTI Treatment on Adipogenesis in Hutchinson–Gilford Progeria Syndrome and Other Lipodystrophic Laminopathies
Source: MDPI journal article supplement (doi:10.3390/cells12101350), 2023-05-09
Supplement: s1 [file s1]

## Supplementary Figures

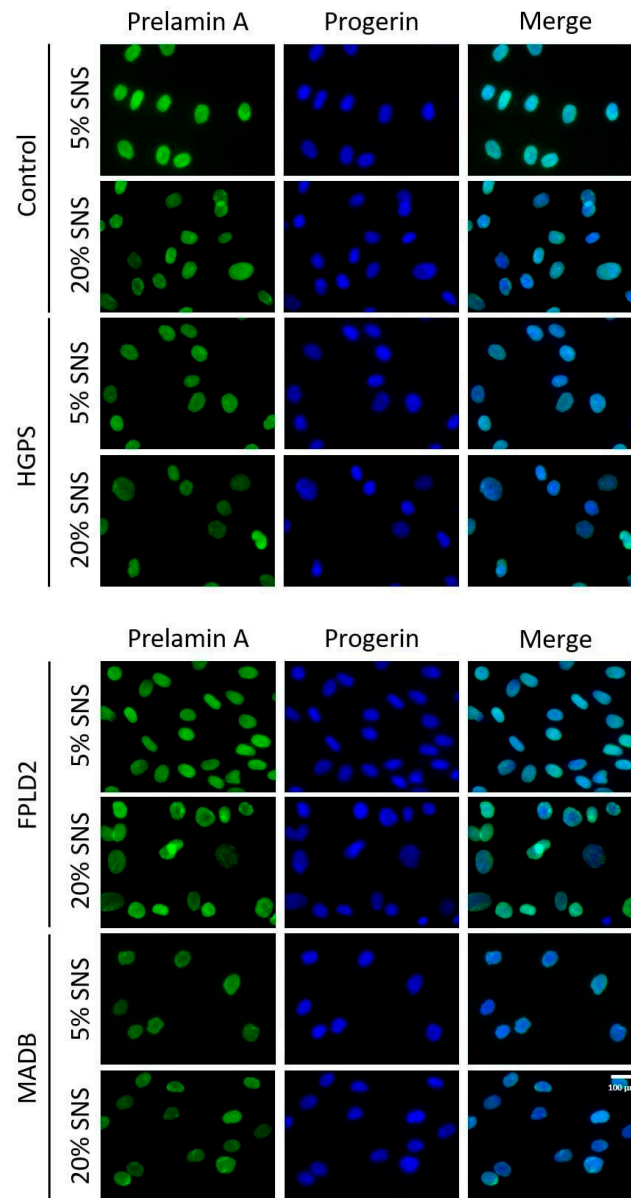

**Figure S1.** Lamin B1 detection in HGPS, FPLD2, and MADB fibroblasts. Immunohistochemistry for lamin B1 in young (SNS  $\leq 5\%$ , control passages 16-21, HGPS passages 10-14, FPLD2 passages 9-14, MADB passages 12-14) and old (SNS  $\geq 20\%$ , control passages 28-31, HGPS passages 18-19, FPLD2 passages 20-23, MADB passages 16-17) control, HGPS, FPLD2 and MADB fibroblasts. Cells were counterstained with DAPI. Scale bar 100  $\mu\text{m}$ .

Full-length scans of western blots in Figure 7 a)

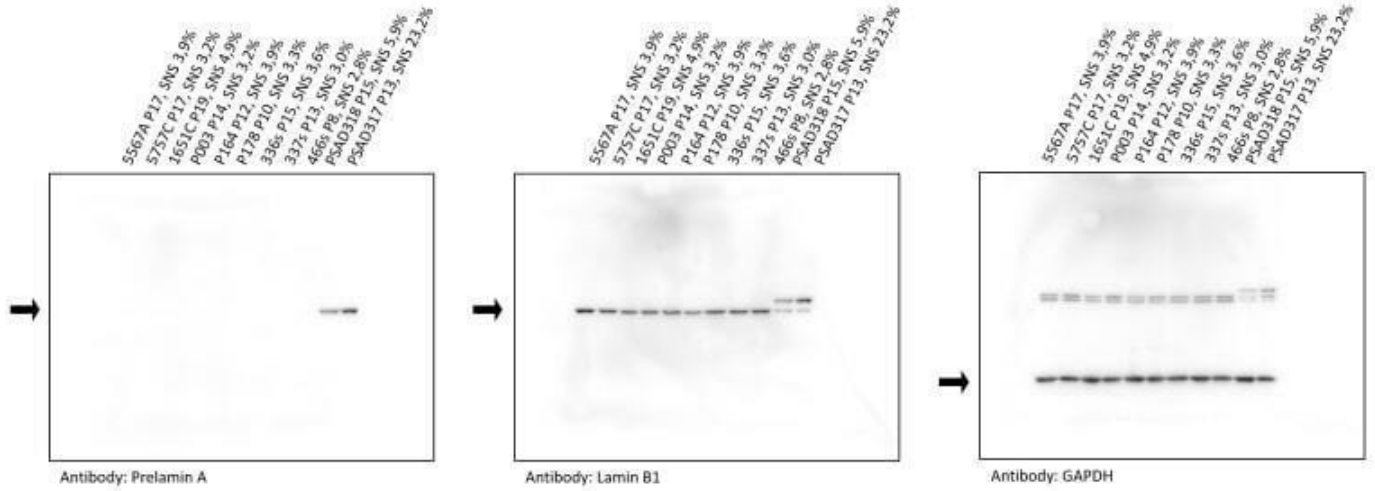

Full-length scans of western blots in Figure 7 d)

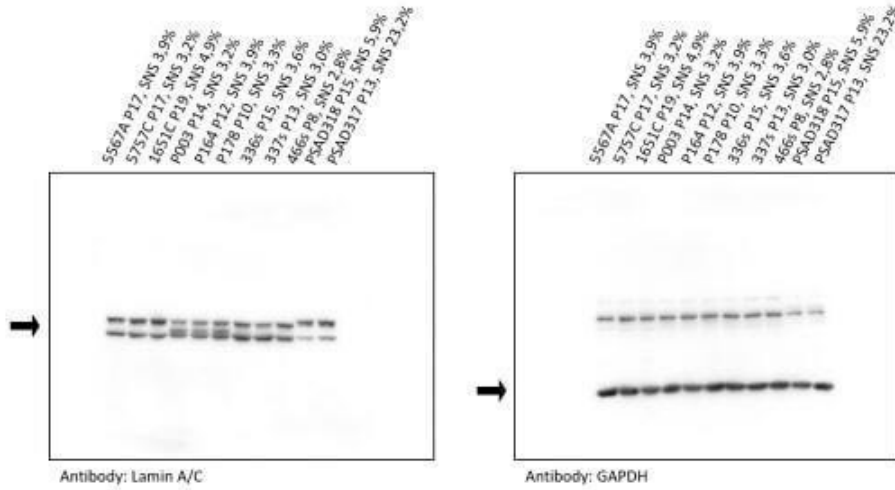

Full-length scans of western blots in Figure 7 e)

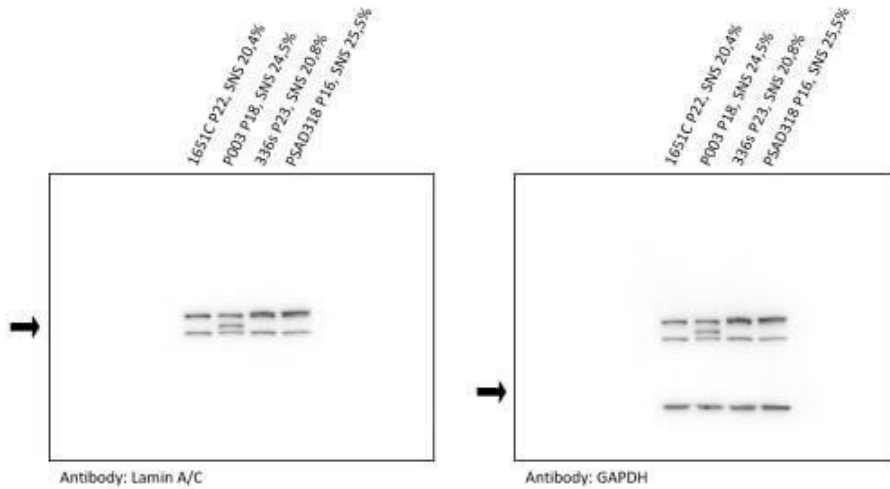

Figure S2. Full-length scan of western blots from Figure 7a, d, e.
